11.03.2020 15:58

# Estimation of the final size of the second phase of coronavirus epidemic by the logistic model

Milan Batista

University of Ljubljana, Slovenia

[milan.batista@fpp.uni-lj.si](mailto:milan.batista@fpp.uni-lj.si)

(Mar 2020)

## Abstract

In the note, the logistic growth regression model is used for the estimation of the final size and its peak time of the coronavirus epidemic in China, South Korea, and the rest of the World.

## 1 Introduction

In the previous article [1], we try to estimate the final size of the epidemic for the whole World using the logistic model and SIR model. The estimation was about 83000 cases. Both models show that the outbreak is moderating; however, new data showed a linear upward trend. It turns out that the epidemic in China was slowing but is begin to spread elsewhere in the World.

In this short post, we will give forecasting epidemic size for China, South Korea, and the rest of the World using the logistic model and daily predictions. Full daily reports for China, Iran, Italy, Slovenia, South Korea and counties outside of China generated are available as linked data at

[https://www.researchgate.net/publication/339816126\\_Estimation\\_of\\_the\\_size\\_of\\_the\\_coronavirus\\_epidemic\\_Report](https://www.researchgate.net/publication/339816126_Estimation_of_the_size_of_the_coronavirus_epidemic_Report)

The MATLAB program fitVirus03 used for calculations is freely available from

<https://www.mathworks.com/matlabcentral/fileexchange/74411-fitvirus>

We note that logistic models give similar results as the SIR model (for the case of China and South Korea). Therefore we, in this note, use the logistic model which given by explicit formula and is thus much simpler for regression analysis than the SIR model, where one must on each step solve a system of ordinary differential equations..

**NOTE: This preprint reports new research that has not been certified by peer review and should not be used to guide clinical practice.**

11.03.2020 15:58

## 2 Logistic grow model

In mathematical epidemiology, when one uses a phenomenological approach, the epidemic dynamics can be described by the following variant of logistic growth model [2-5]

$$\frac{dC}{dt} = rC \left( 1 - \frac{C}{K} \right), \quad (1)$$

where  $C$  is an accumulated number of cases,  $r > 0$  infection rate, and  $K > 0$  is the final epidemic size. If  $C(0) = C_0 > 0$  is the initial number of cases then the solution of (1) is

$$C = \frac{K}{1 + A \exp(-rt)}, \quad (2)$$

where  $A = \frac{K - C_0}{C_0}$ . When  $t \ll 1$ , assuming  $K \gg C_0$ , and therefore  $A \gg 1$  we have the natural growth

$$C = \frac{Ke^{rt}}{e^{rt} + A} = \frac{C_0}{1 - C_0/K} \frac{e^{rt}}{1 + e^{rt}/A} \approx C_0 e^{rt} \quad (3)$$

When  $t \rightarrow \infty$  the number of cases follows the Weibull function

$$C = K(1 - Ae^{-rt} + \dots) \approx K[1 - e^{-r(t-t_0)}] \quad (4)$$

The growth rate  $\frac{dC}{dt}$  reaches its maximum when  $\frac{d^2C}{dt^2} = 0$ . From this condition, we obtain that the growth rate peak occurs in time time

$$t_p = \frac{\ln A}{r} \quad (5)$$

At this time the number of cases is

$$C_p = \frac{K}{2}, \quad (6)$$

and the growth rate is

11.03.2020 15:58

$$\left(\frac{dC}{dt}\right)_p = \frac{rK}{4} \quad (7)$$

Now, if  $C_1, C_2, \dots, C_n$  are the number of cases at times  $t_1, t_2, \dots, t_n$ , then the final size predictions of the epidemic based on these data are  $K_1, K_2, \dots, K_n$ . When convergence is achieved, then one may try to predict the final epidemic size by iterated Shanks transformation [6]

$$K = \frac{K_{n+1}K_{n-1} - K_n^2}{K_{n+1} - 2K_n + K_{n-1}}. \quad (8)$$

There is no natural law or process behind this transformation; therefore, it must be used with some care. In particular, the calculated limit is useless if  $K < C_n$ , i.e., it is below the current data.

The logistic model (2) contains three parameters:  $K$ ,  $r$ , and  $A$ , which should be determined by regression analysis. Because the model is nonlinear, some care should be taken for initial guess. In the fitVirus03 program, the initial estimate is to obtain in the following way. Expressing  $t$  from (2) and use three equidistant data point yield the following system of three equations:

$$t_k - 2m = \frac{1}{r} \ln\left(\frac{AC_{k-2m}}{K - C_{k-2m}}\right), \quad t_k = \frac{1}{r} \ln\left(\frac{AC_k}{K - C_k}\right), \quad t_k - m = \frac{1}{r} \ln\left(\frac{AC_{k-m}}{K - C_{k-m}}\right). \quad (9)$$

This system has a solution [7]

$$K = \frac{C_{k-m}(C_{k-2m}C_{k-m} - 2C_{k-2m}C_k + C_{k-m}C_k)}{C_{k-m}^2 - C_kC_{k-2m}}. \quad (10)$$

$$r = \frac{1}{m} \ln \frac{C_k(C_{k-m} - C_{k-2m})}{C_{k-2m}(C_k - C_{k-m})}. \quad (11)$$

$$A = \frac{(C_k - C_{k-m})(C_{k-m} - C_{k-2m})}{(C_{k-m}^2 - C_kC_{k-2m})} \left[ \frac{C_k(C_{k-m} - C_{k-2m})}{C_{k-2m}(C_k - C_{k-m})} \right]^{\frac{t_k - m}{m}}. \quad (12)$$

The solution is acceptable when all the unknowns are positive. This will be the case when

11.03.2020 15:58

$$C_{k-2m} C_{k-m} + C_{k-m} C_k > 2C_{k-2m} C_k, \quad C_{k-m}^2 > C_k C_{k-2m} \quad (13)$$

Formulas (12),(13),(14) are used to calculate the initial approximation. For practical calculation, we take the first, the middle, and the last data point. The parameters  $K$ ,  $r$ , and  $A$  are then calculated by least-square fit using the MATLAB functions *lsqcurvefit* and *fitnlm*.

Before we proceed, we for convenience. introduce the following epidemy phases (see Fig 1):

1. Phase 1 – exponential growth (lag phase, slow growth) :  $t < t_p - 2/r$
2. Phase 2 – fast growth (positive growth phase, acceleration phase) to an epidemy turning point:  $t_p - 2/r < t < t_p$
3. Phase 3 – fast growth to steady-state (negative growth phase, deceleration phase):  $t_p < t < t_p + 2/r$
4. Phase 4- steady-state (transition phase, slow growth, asymptotic):  $t_p + 2/r < t < 2t_p$
5. Phase 5 – steady) ending phase (plateau stage):  $t > 2t_p$

The duration of the growing period is thus equal to  $\tau = 4t_p$ . We note that the names of the phases are not standard, and arbitrarily chosen.

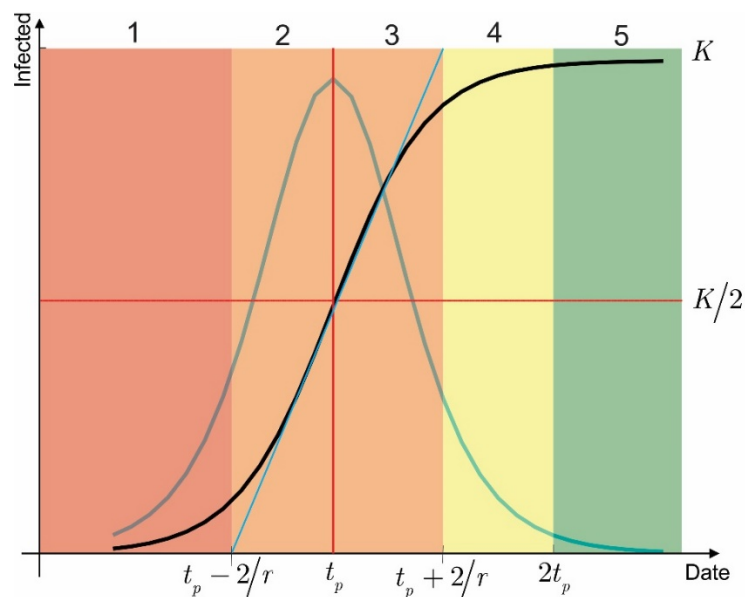

**Figure 1.** Epidemy phases

11.03.2020 15:58

### 3 Results

#### 3.1 China (11.Mar 2020)

On the base of available data, one can predict that the final size of coronavirus epidemy in China using the logistic model will be approximately  $81\ 000 \pm 500$  cases (Table 1) and that the peak of the epidemic was on 8 Feb 2020 (Table 2). It seems that the epidemic in China is in the ending stage (Fig 2, Fig 3).

The short-term forecasting is given in Table 3 where we see that the discrepancy of actual and forecasted number of cases is within 2%. However, actual and predicted daily new cases are scattered and vary between 13% to 300%. On 7 Mar 2020, the actual number of cases was 80695, and the daily number of cases was 44. Prediction in Table 3 is cumulative 80588 cases and 39 daily cases. The errors are 0.1% and 11%, respectively.

**Table 1.** Estimated logistic model parameters for China (data up to 11.Mar 2020)

|          | Estimate     | SE        | tStat  | pValue     |
|----------|--------------|-----------|--------|------------|
| <b>K</b> | <b>80772</b> | 489.04    | 165.16 | 2.0205e-72 |
| r        | 0.22568      | 0.0062941 | 35.855 | 2.4094e-38 |
| A        | 191.23       | 26.978    | 7.0882 | 3.5795e-09 |

Number of observations: 55, Error degrees of freedom: 52  
Root Mean Squared Error: 1.9e+03  
R-Squared: 0.997, Adjusted R-Squared 0.997  
F-statistic vs. zero model: 1.61e+04, p-value = 4.02e-77

11.03.2020 15:58

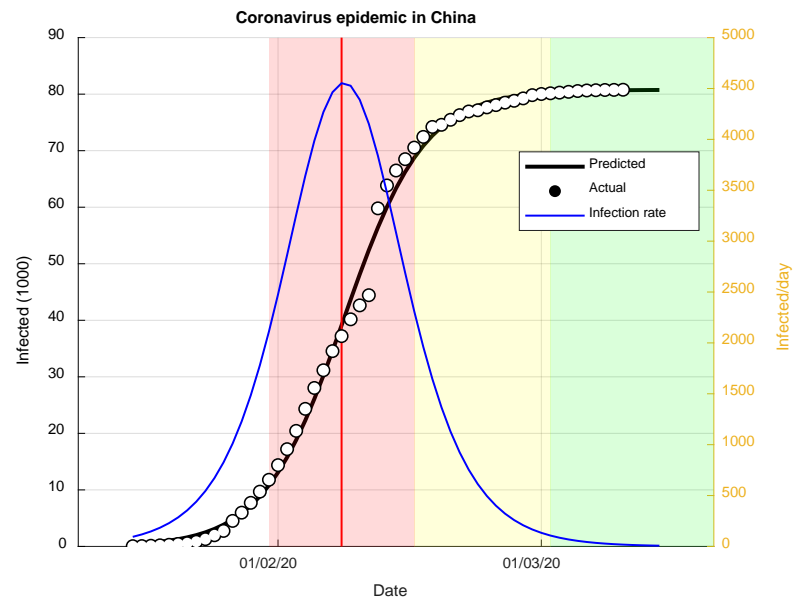

**Figure 2.** Predicted evaluation of coronavirus epidemic in China

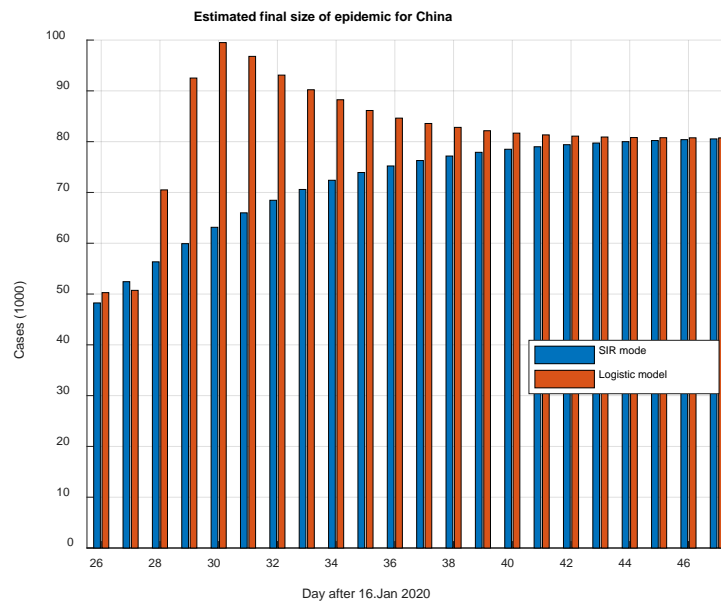

**Figure 3.** Predicted final size of coronavirus epidemic in China (prediction from 2. Mar 2020)

11.03.2020 15:58

**Table 2.** Results of daily logistic regression for China (data from 4.Mar 2020)

| day | date      | C<br>(cases) | K<br>(cases) | r<br>(1/day) | A       | t_peak<br>(day) | dC_peak<br>(cases/day) | date_peak |
|-----|-----------|--------------|--------------|--------------|---------|-----------------|------------------------|-----------|
| 16  | 31.jan.20 | 11789        | 17884        | 0.452        | 460.109 | 13              | 2019                   | 30.jan.20 |
| 17  | 1.feb.20  | 14378        | 21578        | 0.415        | 398.528 | 14              | 2238                   | 31.jan.20 |
| 18  | 2.feb.20  | 17203        | 25879        | 0.383        | 353.422 | 15              | 2476                   | 1.feb.20  |
| 19  | 3.feb.20  | 20438        | 31161        | 0.354        | 319.58  | 16              | 2753                   | 2.feb.20  |
| 20  | 4.feb.20  | 24332        | 38706        | 0.324        | 294.507 | 17              | 3136                   | 3.feb.20  |
| 21  | 5.feb.20  | 28028        | 44255        | 0.308        | 283.606 | 18              | 3406                   | 4.feb.20  |
| 22  | 6.feb.20  | 31161        | 45828        | 0.303        | 279.609 | 18              | 3476                   | 4.feb.20  |
| 23  | 7.feb.20  | 34546        | 47586        | 0.298        | 272.671 | 18              | 3545                   | 4.feb.20  |
| 24  | 8.feb.20  | 37198        | 48066        | 0.296        | 269.981 | 18              | 3561                   | 4.feb.20  |
| 25  | 9.feb.20  | 40171        | 49272        | 0.292        | 261.091 | 19              | 3594                   | 5.feb.20  |
| 26  | 10.feb.20 | 42638        | 50275        | 0.288        | 252.341 | 19              | 3614                   | 5.feb.20  |
| 27  | 11.feb.20 | 44438        | 50724        | 0.286        | 247.719 | 19              | 3621                   | 5.feb.20  |
| 28  | 12.feb.20 | 59800        | 70500        | 0.226        | 154.092 | 22              | 3989                   | 8.feb.20  |
| 29  | 13.feb.20 | 63850        | 92522        | 0.198        | 138.603 | 24              | 4585                   | 10.feb.20 |
| 30  | 14.feb.20 | 66492        | 99501        | 0.192        | 137.601 | 25              | 4785                   | 11.feb.20 |
| 31  | 15.feb.20 | 68500        | 96788        | 0.195        | 138.393 | 25              | 4712                   | 11.feb.20 |
| 32  | 16.feb.20 | 70548        | 93100        | 0.199        | 141.105 | 24              | 4625                   | 10.feb.20 |
| 33  | 17.feb.20 | 72436        | 90217        | 0.203        | 144.985 | 24              | 4569                   | 10.feb.20 |
| 34  | 18.feb.20 | 74199        | 88248        | 0.206        | 149.059 | 24              | 4540                   | 10.feb.20 |
| 35  | 19.feb.20 | 74576        | 86134        | 0.21         | 155.327 | 24              | 4519                   | 10.feb.20 |
| 36  | 20.feb.20 | 75464        | 84630        | 0.213        | 161.403 | 23              | 4512                   | 9.feb.20  |
| 37  | 21.feb.20 | 76288        | 83577        | 0.216        | 166.902 | 23              | 4513                   | 9.feb.20  |
| 38  | 22.feb.20 | 76936        | 82810        | 0.218        | 171.816 | 23              | 4518                   | 9.feb.20  |
| 39  | 23.feb.20 | 77150        | 82149        | 0.22         | 176.855 | 23              | 4525                   | 9.feb.20  |
| 40  | 24.feb.20 | 77658        | 81677        | 0.222        | 181.054 | 23              | 4533                   | 9.feb.20  |
| 41  | 25.feb.20 | 78064        | 81329        | 0.223        | 184.574 | 23              | 4541                   | 9.feb.20  |
| 42  | 26.feb.20 | 78495        | 81087        | 0.224        | 187.292 | 23              | 4547                   | 9.feb.20  |
| 43  | 27.feb.20 | 78824        | 80912        | 0.225        | 189.429 | 23              | 4552                   | 9.feb.20  |
| 44  | 28.feb.20 | 79251        | 80805        | 0.226        | 190.85  | 23              | 4556                   | 9.feb.20  |
| 45  | 29.feb.20 | 79824        | 80774        | 0.226        | 191.288 | 23              | 4557                   | 9.feb.20  |
| 46  | 1.mar.20  | 80026        | 80755        | 0.226        | 191.566 | 23              | 4558                   | 9.feb.20  |
| 47  | 2.mar.20  | 80151        | 80741        | 0.226        | 191.792 | 23              | 4558                   | 9.feb.20  |

11.03.2020 15:58

**Table 3.** Short-term forecasting for China

| Day | Date      | Actual | Predicted | Error % | Daily actual | Daily predicted | Error % |
|-----|-----------|--------|-----------|---------|--------------|-----------------|---------|
| 44  | 28.feb.20 | 79251  | 79814     | 0.945   | 427          | 232             | 45.667  |
| 45  | 29.feb.20 | 79824  | 80000     | 0.407   | 573          | 186             | 67.539  |
| 46  | 1.mar.20  | 80026  | 80149     | 0.302   | 202          | 149             | 26.238  |
| 47  | 2.mar.20  | 80151  | 80268     | 0.265   | 125          | 119             | 4.8     |
| 48  | 3.mar.20  | -      | 80363     | -       | -            | 95              |         |
| 49  | 4.mar.20  | -      | 80439     | -       | -            | 76              |         |
| 50  | 5.mar.20  | -      | 80500     | -       | -            | 61              |         |
| 51  | 6.mar.20  | -      | 80549     | -       | -            | 49              |         |
| 52  | 7.mar.20  | -      | 80588     | -       | -            | 39              |         |

### 3.2 South Korea (11.Mar 2020)

On the base of available data, one can predict that the final size of coronavirus epidemic in of South Korea using the logistic model will be approximately  $7900 \pm 100$  cases (Fig 4, Table 4) and that the peak of the epidemic was on 1 Mar 2020. The epidemic in South Korea appears to be in the steady-state transition phase. These figures were already predicted on 4. Mar 2020 (Table 4), i.e., the prediction was approximately 7500 to 8500 cases and that the peak will be around 2 Mar. However, it is an early-stage epidemic, so these estimates are very questionable and will be changed with new data.

On 7 Mar 2020, the actual number of cases was 7134, and the daily number of cases was 367. Prediction in Table 5 is cumulative 6572 cases and 259 daily cases. The errors are 8 % and 30%, respectively.

**Table 4.** Estimated logistic model parameters for South Korea up to 3.Mar 2020

|          | Estimate      | SE       | tStat  | pValue     |
|----------|---------------|----------|--------|------------|
| <b>K</b> | <b>7883.6</b> | 100.24   | 78.644 | 2.3728e-25 |
| r        | 0.37927       | 0.012001 | 31.602 | 6.86e-18   |
| A        | 96.863        | 11.883   | 8.1513 | 1.2674e-07 |

Number of observations: 22, Error degrees of freedom: 19  
 Root Mean Squared Error: 125  
 R-Squared: 0.998, Adjusted R-Squared 0.998  
 F-statistic vs. zero model: 9.23e+03, p-value = 3.18e-30



11.03.2020 15:58

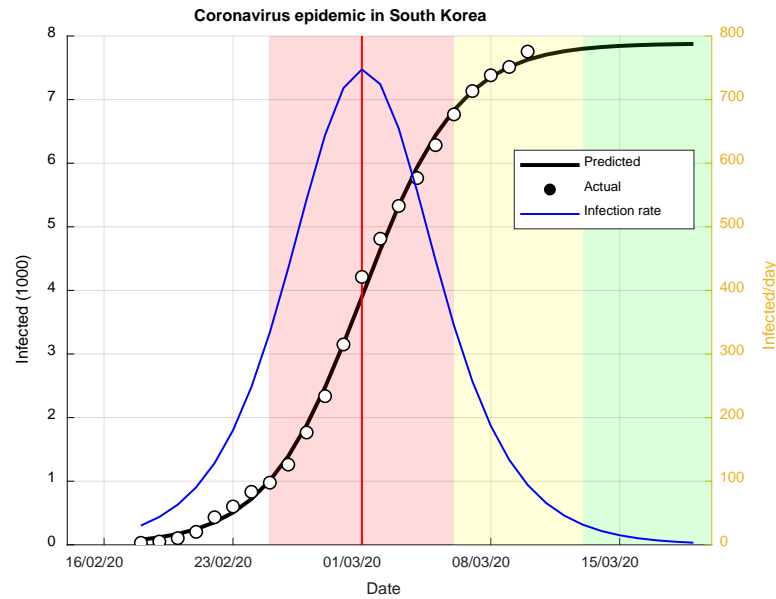

**Figure 4.** Predicted evaluation of coronavirus epidemic in South Korea

**Table 5.** Results of daily logistic regression for South Korea

| day | date      | C<br>(cases) | K<br>(cases) | r<br>(1/day) | A       | t_peak<br>(day) | dC_peak<br>(cases/day) | date_peak |
|-----|-----------|--------------|--------------|--------------|---------|-----------------|------------------------|-----------|
| 7   | 24.feb.20 | 833          | 1105         | 0.824        | 47.332  | 4               | 227                    | 23.feb.20 |
| 8   | 25.feb.20 | 977          | 1133         | 0.808        | 46.526  | 4               | 228                    | 23.feb.20 |
| 9   | 26.feb.20 | 1261         | 1508         | 0.633        | 37.083  | 5               | 238                    | 24.feb.20 |
| 10  | 27.feb.20 | 1766         | 3355         | 0.426        | 44.537  | 8               | 357                    | 27.feb.20 |
| 11  | 28.feb.20 | 2337         | 7021         | 0.363        | 76.656  | 11              | 636                    | 1.mar.20  |
| 12  | 29.feb.20 | 3150         | 17145        | 0.328        | 165.531 | 15              | 1405                   | 5.mar.20  |
| 13  | 1.mar.20  | 3736         | 8639         | 0.359        | 95.534  | 12              | 775                    | 2.mar.20  |
| 14  | 2.mar.20  | 4335         | 7214         | 0.378        | 88.434  | 11              | 682                    | 1.mar.20  |

**Table 6.** Short-term forecasting for South Korea

| day | date      | actual | predict | Error % | Daily actual | Daily predict. | Error % |
|-----|-----------|--------|---------|---------|--------------|----------------|---------|
| 11  | 28.feb.20 | 2337   | 2393    | 29.7    | 571          | 562            | 1.6     |
| 12  | 29.feb.20 | 3150   | 3031    | 17.7    | 813          | 638            | 21.5    |
| 13  | 1.mar.20  | 3736   | 3708    | 17.2    | 586          | 677            | 15.5    |
| 14  | 2.mar.20  | 4335   | 4378    | 15.3    | 599          | 670            | 11.9    |
| 15  | 3.mar.20  | -      | 4997    | -       | -            | 619            | -       |
| 16  | 4.mar.20  | -      | 5532    | -       | -            | 535            | -       |
| 17  | 5.mar.20  | -      | 5971    | -       | -            | 439            | -       |
| 18  | 6.mar.20  | -      | 6313    | -       | -            | 342            | -       |
| 19  | 7.mar.20  | -      | 6572    | -       | -            | 259            | -       |
| 20  | 8.mar.20  | -      | 6761    | -       | -            | 189            | -       |

11.03.2020 15:58

### 3.3. Rest of the World

The comparison of the predicted final sizes is shown in the graph in Figure 3. Based on the data, a very rough estimate (the model is statistically unreliable) indicates that the number of cases will be about 15000 and that the peak will be around 15 Mar. However, as in the case of South Korea, it is an early-stage epidemic, so these estimates are very questionable and will be changed with new data.

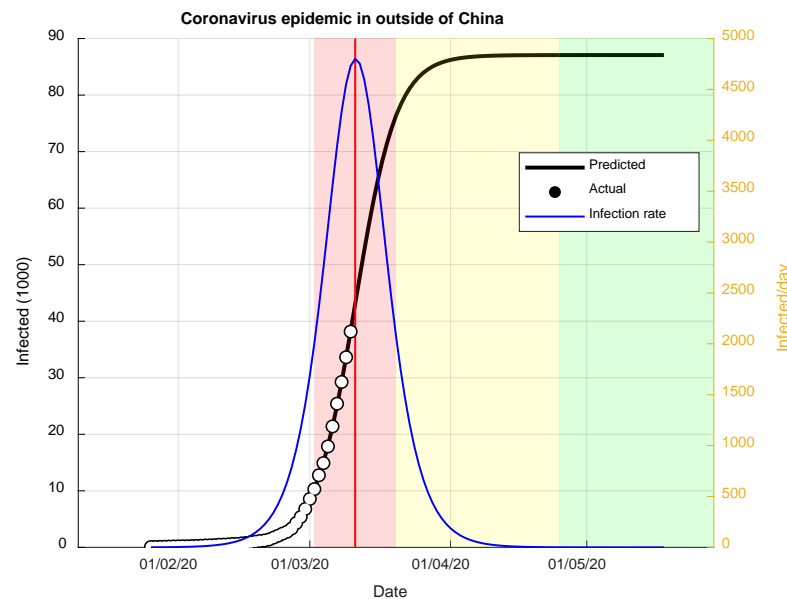

**Figure 5.** Predicted evaluation of coronavirus epidemic outside of China

## 4 Conclusion

On the base of available data, one can predict that the final size of coronavirus epidemic in China will be around 81 000 cases. For South Korea, a prediction is about 8000 cases. For the rest of the World, the forecasts are still very unreliable in is now approximatly 90000 cases.

We emphasize that the logistic model is a data-driven phenomenological model. Thus its predictions are as good as useful data are and as good as it can mimics epidemic dynamics. Because, as it said, the logistic model is phenomenological, it's in a way mimic both epidemic spreading and its control i.e. prevention measures. When daily predictions of epidemic size begin to converge, we can say that epidemic is in control. Any deviation from the prediction curve may indicate that epidemic may be running

11.03.2020 15:58

out of control. This happens in China, were up to say 25. Feb accumulated cases follow the logistic curve, and then they begin to deviate from it. We now know that this was the beginning of the second stage of epeidimy which is now spreading all over the World.

## References

- [1] M. Batista, Estimation of the final size of the COVID-19 epidemic, medRxiv, (2020) 2020.2002.2016.20023606.
- [2] X.S. Wang, J.H. Wu, Y. Yang, Richards model revisited: Validation by and application to infection dynamics, J Theor Biol, 313 (2012) 12-19.
- [3] B. Pell, Y. Kuang, C. Viboud, G. Chowell, Using phenomenological models for forecasting the 2015 Ebola challenge, Epidemics, 22 (2018) 62-70.
- [4] F. Brauer, Mathematical epidemiology: Past, present, and future, Infectious Disease Modelling, 2 (2017) 113-127.
- [5] S.L. Chowell G, Viboud C, Kuang Y., West Africa Approaching a Catastrophic Phase or is the 2014 Ebola Epidemic Slowing Down? Different Models Yield Different Answers for Liberia. , PLOS Currents Outbreaks., (2014).
- [6] C.M. Bender, S.A. Orszag, Advanced mathematical methods for scientists and engineers I asymptotic methods and perturbation theory, Springer, New York, 1999.
- [7] P.F. Verhulst, Notice sur la loi que la population poursuit dans son accroissement, Correspondance mathématique et physique, 10 (1838) 113-121.
